# Supplementary material for: Cross-Species Transmission and Differential Fate of an Endogenous Retrovirus in Three Mammal Lineages
Source: PubMed Central journal article supplement (PMC4643047; doi:10.1371/journal.ppat.1005279), 2015-11-12

0.1

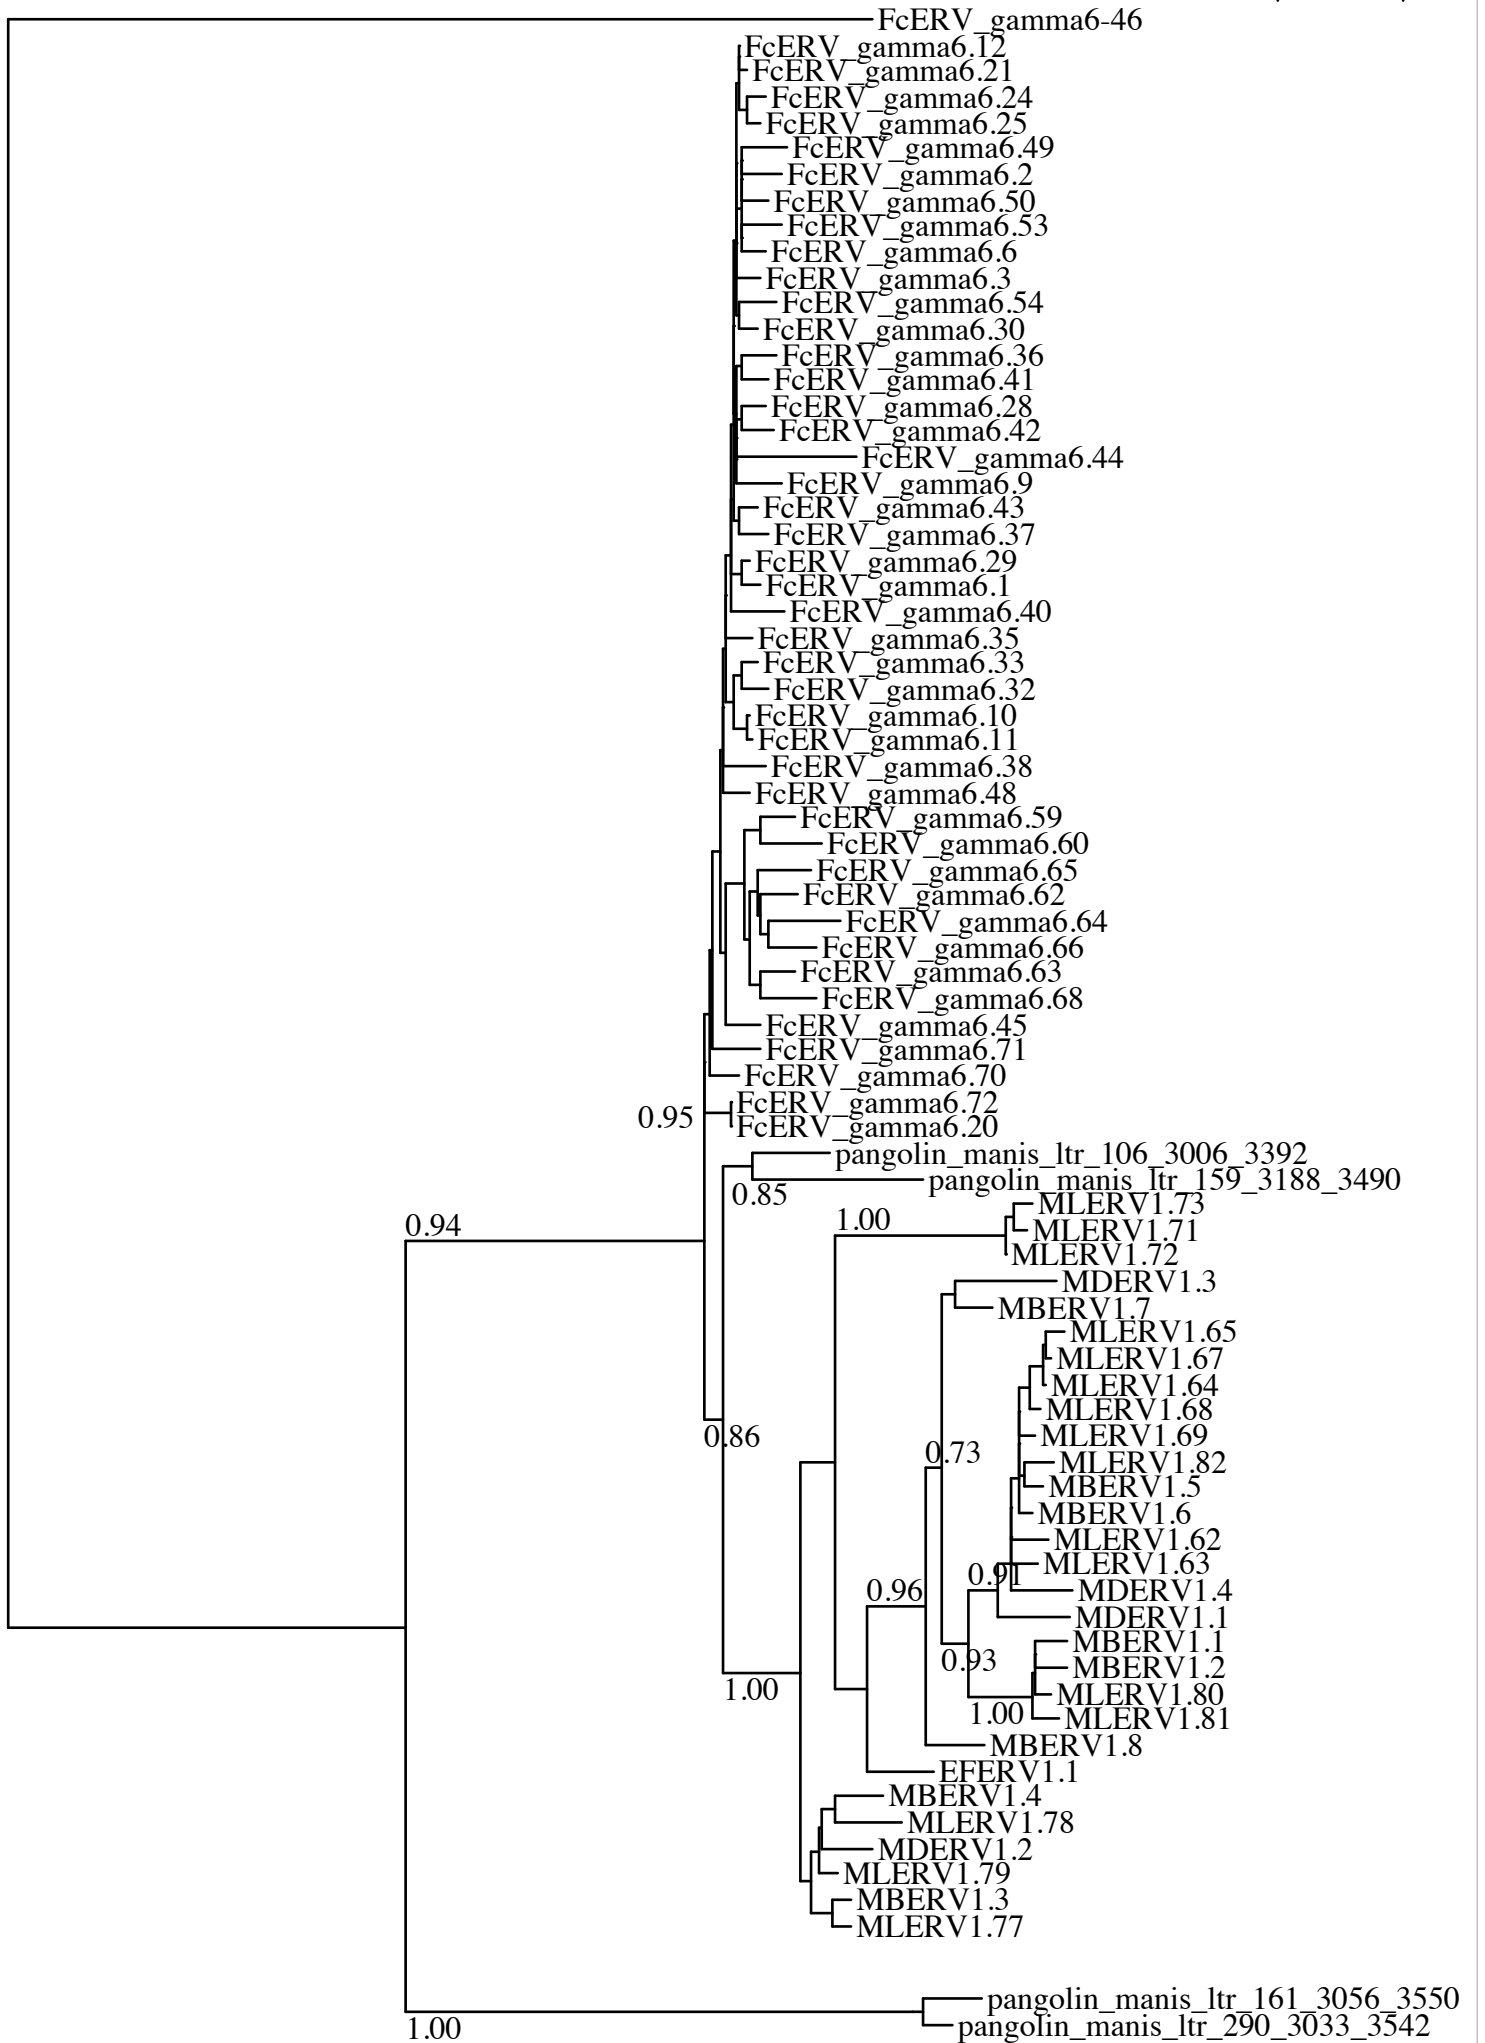

Supplement: ppat.1005279.s004.pdf [file ppat.1005279.s004.pdf]
