# Supplementary material for: Cross-Species Transmission and Differential Fate of an Endogenous Retrovirus in Three Mammal Lineages
Source: PubMed Central journal article supplement (PMC4643047; doi:10.1371/journal.ppat.1005279), 2015-11-12

Ferequency of stop codon/frameshift mutation (per codon)

0.02

0.01

0.00

Gag\_MA

Gag\_p30

RnaseH

rve

RVP

RVT\_1

TLV\_coat

domains

subfamily

FcERV\_y6

MLERV1.1

MLERV1.2

MLERV1.3

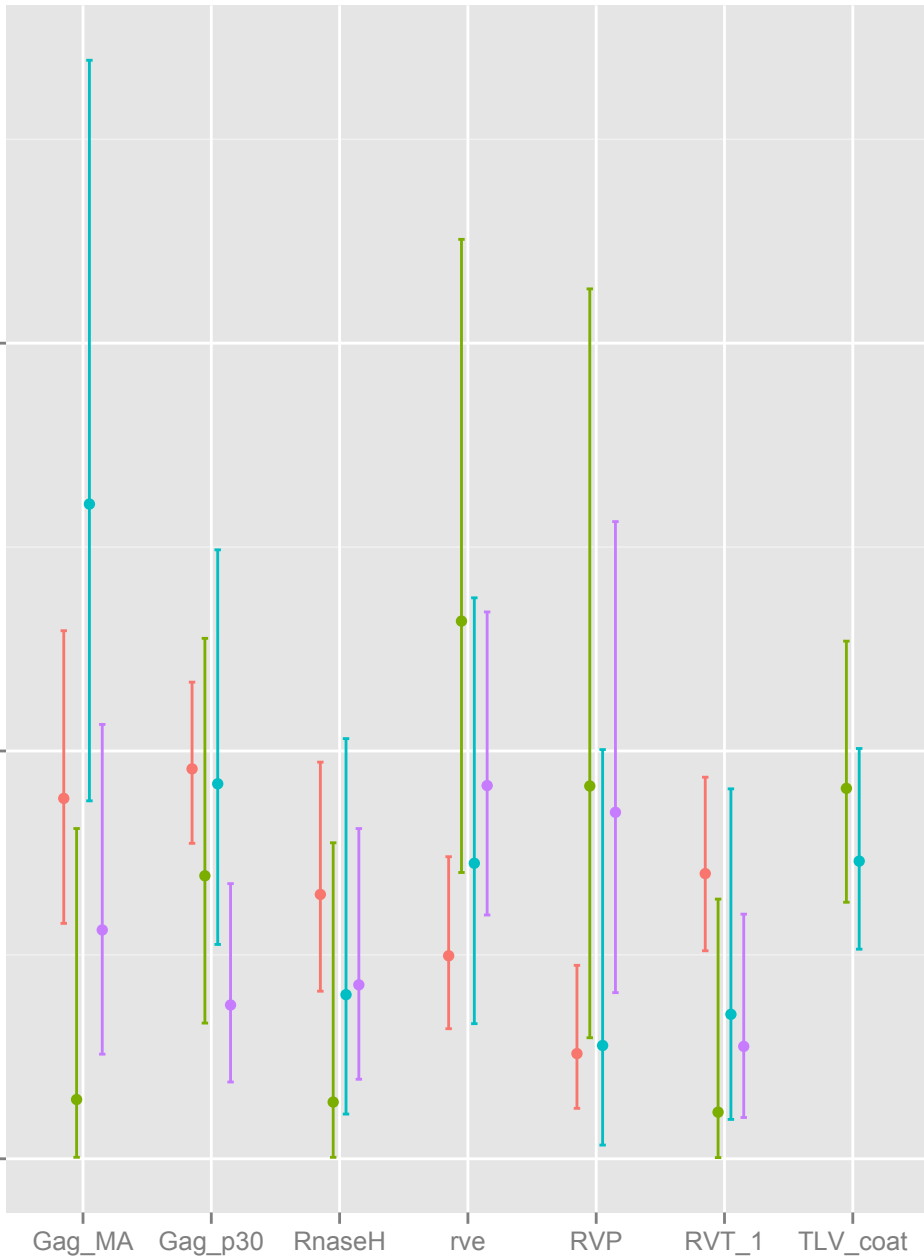

Supplement: ppat.1005279.s005.pdf [file ppat.1005279.s005.pdf]
